# Supplementary material for: GIGA: a versatile genetic algorithm for free and supported clusters and nanoparticles in the presence of ligands
Source: Royal Society of Chemistry journal article supplement (doi:10.1039/c9nr02031d), 2019-01-01
Supplement: c9nr02031d1.pdf [file c9nr02031d1.pdf]

Cite this: DOI: 10.1039/xxxxxxxxxx

## Supplementary Information - GIGA: A Versatile Genetic Algorithm for Free and Supported Clusters and Nanoparticles in the Presence of Ligands

Marc Jäger,<sup>\*a</sup> Rolf Schäfer,<sup>a</sup> and Roy L. Johnston<sup>\*b</sup>

### 1 GA Analysis Tool

In the following, the GA analysis tool is described. The purpose of the analysis algorithm is to provide a fast, handy and thorough analysis of all structural motifs found during the GO independent of the specific quantum chemical software used for local minimisations. Therefore, the analysis software consists of three sub-programs, written in object oriented Python: **Extraction**, **Analysis1** and **Analysis2**. With **Extraction**, all information of the cluster structures generated during the GO are extracted, **Analysis1** is used for automatic grouping of different cluster structures according to structural and energy criteria, **Analysis2** is used for automatic visualisation and checking of the results of **Analysis1** as well as for automatic documentation of the results.

#### Extraction

The purpose of the **Extraction** class is: i) extraction of the quantum chemical output calculation in an uniform format with and fix units ( $[r] = \text{Å}$ ,  $[E] = \text{eV}$ ) independent of the quantum chemical backend used; ii) to save space on the hard disk, since typical quantum chemical output files of a local optimisation are in the range between 1 MB and 80 MB and the files generated with the **Extraction** program are smaller than 1 kB. The **Extraction** class iterates through all generated quantum chemical outputs (all cluster structures) and extracts information such as the final coordinates, the energy in eV, the CPU time taken, the number of the cluster structure (*strucNr*). With this information, for each cluster three small ASCII files are generated: *clusterName\_strucNr.energy*, *clusterName\_strucNr.xyz*, *clusterName\_strucNr\_aligned.xyz*. All the extracted information is saved for each cluster structure in the *clusterName\_strucNr.energy* files and are used in the **Analysis1** program. The two geometry files only differ in the orientation of the cluster. The files *clusterName\_strucNr.xyz* contain the cluster in the same orientation as in the corresponding quantum chemical output. In *clusterName\_strucNr\_aligned.xyz* the cluster is aligned in a distinct, specified way: first the cluster is transformed so its

center of mass (CoM) is at the origin. Then the cluster is rotated so that the most distant atom (with respect to the CoM) lies on the x-axis; second a rotation around the x-axis is performed so that the z component of the second most distant atom (with respect to the CoM) vanishes. The generated geometry files are used for cluster structure visualisation in the **Analysis2** program.

#### Analysis1

In **Analysis1**, the assignment of the individual cluster structure into different geometry motifs takes place. First the data from all .energy files are imported into an array and arranged in order of ascending energy. Then an iterative process is performed. Starting with the GM, all cluster structures in the array are compared to the GM structure according to a structural *diff* (relative value) criterion and an energetic criterion *Ediff* (in eV). Regarding the structural criterion, all atomic distances (taking into account the element types) within two clusters are compared and if the relative deviation exceeds *diff* then the two structures are considered to be different. The energetic criterion *Ediff* is the maximum allowable energy difference (in eV) between two cluster structures for them to be assigned to the same geometry group. According to *Ediff* and *diff* all generated cluster structures are grouped into several geometry groups. The first group (*GroupNr 1*) exhibits the GM geometry. Additionally the moment of inertia eigenvalues are calculated for each cluster structure, since they can be used as additional structural comparison criteria. Four different output ASCII files are generated by **Analysis1**: *AllClusters*, *AllClusters\_Ordered*, *ErrorList* and *results*. *ErrorList* contains all structures, which are not converged. All groups with the lowest and highest energy structure within each group are listed in results. The geometry group, total Energy and the *strucNr* of all generated cluster structures ordered according to the *strucNr* are specified in *AllClusters\_Ordered*. The *strucNr* of all clusters, the assigned geometry group and moment of inertia eigenvalues are written in *AllClusters*. This file is ordered according to the assigned groups (*GroupNr*) and all cluster geometries within each group are listed in ascending energy order.

#### Analysis2

**Analysis2** provides a selection menu with different automatic vi-

<sup>a</sup> Technische Universität Darmstadt, Eduard-Zintl Institut für Anorganische und Physikalische Chemie, Alarich-Weiss-Straße 8, 64287 Darmstadt, Germany. E-mail: jaeger@cluster.pc.chemie.tu-darmstadt.de

<sup>b</sup> University of Birmingham, School of Chemistry, Edgbaston, Birmingham B15 2TT, United Kingdom. E-mail: r.l.johnston@bham.ac.uk

sualisation analysis modes to check and, if necessary, correct the clustering results of **Analysis1**. A screenshot of the selection menu is shown in Fig. 1. During this process, the user should note the *strucNr* of each cluster representing a new geometry. At the end of the analysis process, all extracted *strucNr* are passed as input to the program and an Excel output file is generated.

Fig. 2 and Fig. 3 illustrate several geometry groups found with the analysis tool for the example of  $[\text{Cd}_3\text{Se}_3(\text{H}_2\text{S})_3]^+$  obtained with optimisation mode **a** (optimisation from scratch at the PBE level of theory using Quantum Espresso as the quantum chemical software package).

Jupyter GA\_Analysis\_program Last Checkpoint: 01/28/2019 (unsaved changes) Logout

File Edit View Insert Cell Kernel Widgets Help Python [conda env:dog-project]

GIGA and MEGA GAAnalysis written by Marc Jäger

```

Main informations:
System name: Cd3Se3S3H6
Analysis parameter: Ediff = 0.2 diff = 0.2
4380 structures have been generated
The GM is in structure number 410 with total energy -6926.626

Please insert one of the following modes:

[1] Show GA convergence
[2] Show geometry group abundance
[3] Show moments of inertia distribution
[4] Show GM
[5] Show all found group geometries for Emin in results...txt file
[6] Show all found group geometries for Emin and Emax in results...txt file
[7] Show all Cluster within one group with largest deviation in energy and moments of inertia (Emax, dIx, dIy, dIz, dIges)
[8] Show Emin structure of a specified group
[9] Show the structure of specified a OutputfileNr
[10] Show all final pool structures
[11] Show the max. 4 structures with largest dIges within one group together with the Emin structure of this group
[12] Enter exit to leave this menu and to continue

Insert mode (that is number without brackets)

```

Fig. 1 Selection menu of Analysis2 for automatic visualisation of the results of Analysis1.

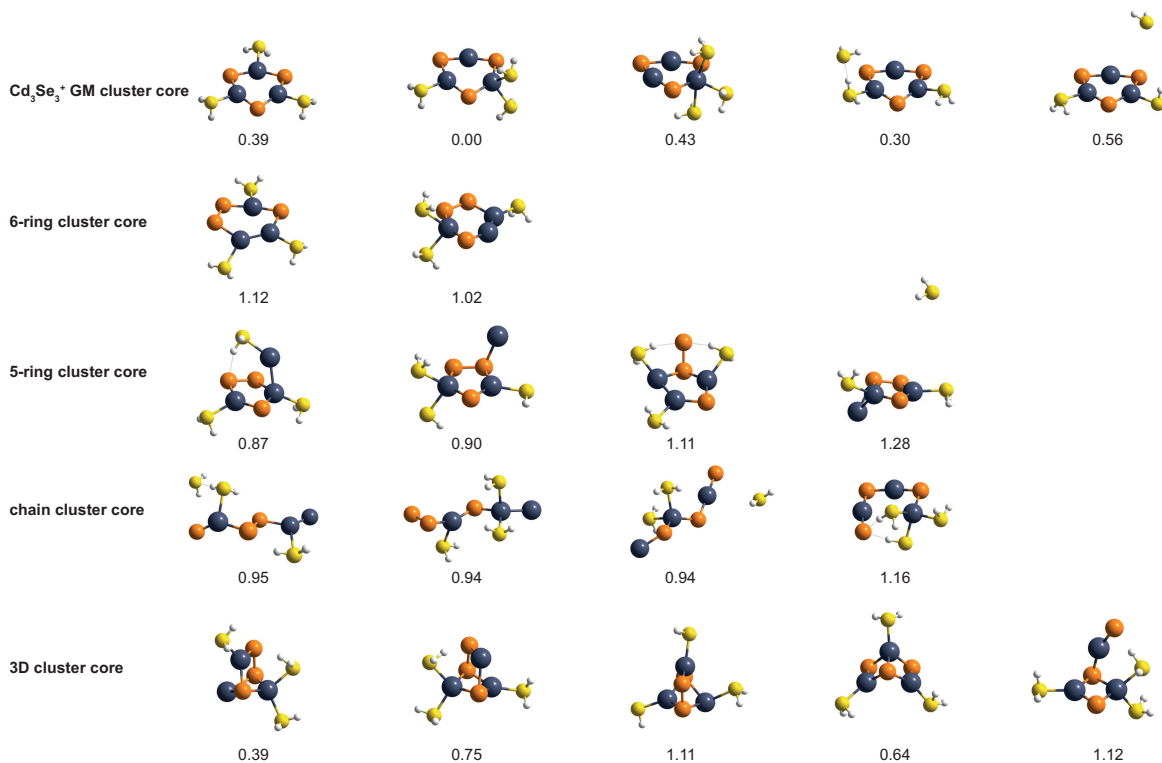

Fig. 2  $[\text{Cd}_3\text{Se}_3(\text{H}_2\text{S})_3]^+$  structural motifs with intact ligands. Relative energies are in eV.

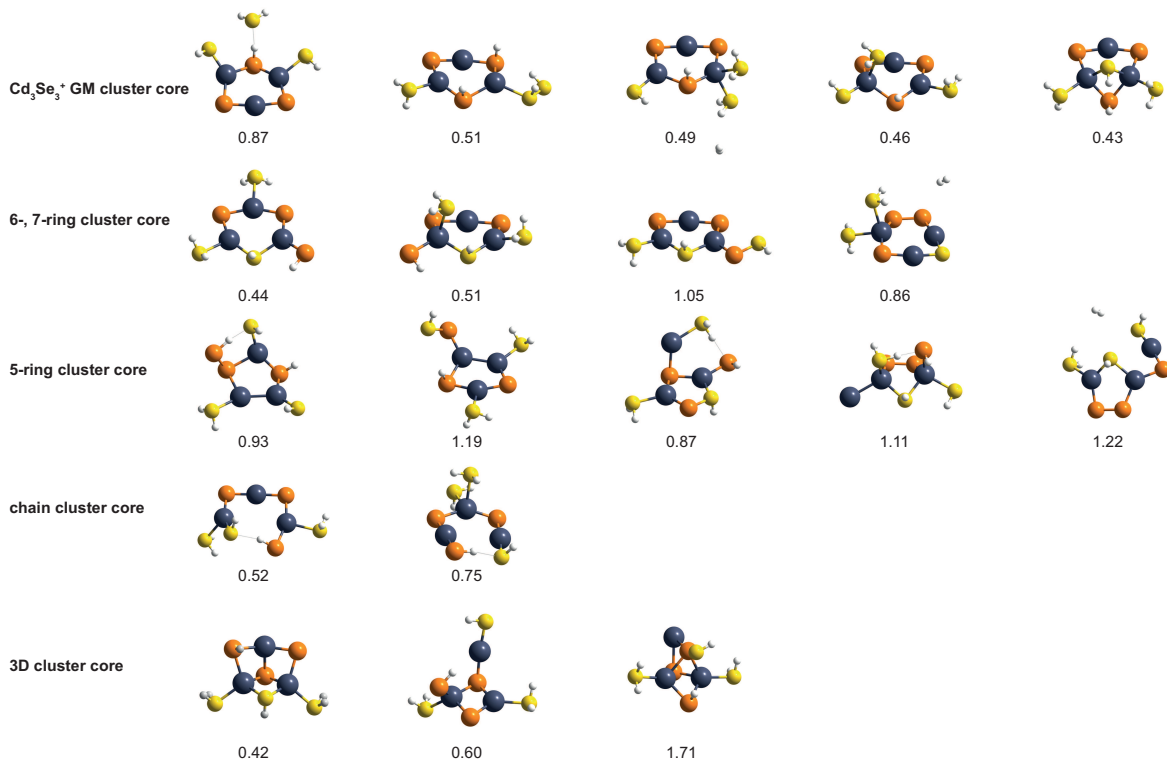

Fig. 3 [Cd<sub>3</sub>Se<sub>3</sub>(H<sub>2</sub>S)<sub>3</sub>]<sup>+</sup> structural motifs where ligand dissociation occurs. Relative energies are in eV.

## 2 Coordinates

All coordinates are given in Å.

```

bare Cd3Se3+ GM
Cd -1.615317880000 -0.942005430000 0.385045470000
Cd 0.076601170000 1.287039780000 -1.426184050000
Cd 1.535914140000 -0.373574290000 1.072359350000
Se 2.390389030000 1.384933200000 -0.559370730000
Se -2.273131930000 0.542177620000 -1.575073410000
Se -0.113300530000 -1.886819150000 2.090367790000
[Cd3Se3(H2S)3]+ Iso-I
Cd 1.304584100000 1.410252650000 -0.785410130000
Cd -0.640241600000 -1.496428240000 -1.265483080000
Se 0.875542380000 -0.124522780000 -2.668089100000
Cd -0.695349230000 0.108632590000 1.984557590000
Se 0.732441520000 2.132040310000 1.611937290000
Se -1.869661360000 -1.818691260000 0.952239160000
S -1.232517750000 0.049207910000 4.688082590000
H -2.502288240000 -0.393526230000 4.616892620000
H -1.605119550000 1.332954310000 4.850832970000
S -1.314746910000 -3.763602510000 -2.703363590000
H -1.245495810000 -3.200665360000 -3.924557780000
H -2.655758890000 -3.658040900000 -2.644835570000
S 3.333939300000 3.154434620000 -1.483339990000
H 3.149039110000 3.065315970000 -2.814200150000
H 2.658186980000 4.315292830000 -1.389055590000
[Cd3Se3(H2S)3]+ Iso-II
Cd 0.732641310000 -0.884430280000 -1.764306270000
Cd -1.617500190000 -0.795899200000 1.018501000000
Cd 0.881523540000 1.690986080000 0.803653610000
Se -0.972154790000 1.177748820000 2.358457350000
Se 2.197797230000 1.076870290000 -1.308057490000
Se -1.137862440000 -2.333895530000 -0.977444990000
S 1.536641730000 -1.909803890000 -4.197248580000
H 2.868131880000 -1.835531750000 -4.010457240000
H 1.486141640000 -3.219453530000 -3.888270860000
S -3.923179820000 -1.879617700000 2.098423880000
H -3.704163160000 -1.465066630000 3.360723800000
H -3.476066100000 -3.125043190000 2.347272780000
S 2.187837270000 3.951839030000 1.721912800000
H 1.121557240000 4.501040810000 2.334007170000
H 2.059187700000 4.729255720000 0.630130330000
[Cd3Se3(H2S)3]+ Iso-III
Cd -1.687033330000 1.001702430000 -0.962479550000
Cd 0.585188810000 -1.120327920000 -1.383416690000
Se 2.795838430000 -0.794135710000 0.306710290000
Se -0.074407480000 1.805763730000 -2.6565952830000
Cd 1.624851550000 0.560207140000 -1.345599510000
Se -1.962660000000 -0.479970290000 1.089281330000
S -4.157094690000 2.104355360000 -1.383416690000
H -4.018030590000 2.321628100000 -2.705466770000
H -4.866651580000 0.973917790000 -1.563410180000

```

```

S 0.387074630000 -3.824770840000 2.072274000000
H -0.623262380000 -4.163755520000 1.250002250000
H 1.332312880000 -4.176317210000 1.179327170000
S 0.946766630000 -0.469854710000 4.139105710000
H 0.301657760000 0.711294340000 4.163019750000
H 2.143478430000 0.105274770000 3.911049960000
[Cd3Se3(H2S)3]+ Iso-IV
Cd -1.519737230000 0.702223200000 0.989402990000
Cd 0.190219020000 0.650553620000 -1.686936850000
Cd 1.067165670000 -1.398232090000 0.777745510000
Se 1.118376970000 1.287148700000 0.719169400000
Se -2.436554210000 1.331124450000 -1.354375650000
Se -0.856451390000 -1.168425040000 2.533352090000
S 3.157610300000 -2.777678840000 1.677444340000
H 3.066668250000 -2.363184570000 2.956455290000
H 2.510262120000 -3.932559490000 1.928365840000
S 0.684407140000 -1.874039210000 -1.721620740000
H -2.995901300000 -0.005872300000 -1.601464890000
H 1.974567200000 -1.719111600000 -2.075135710000
S 1.207180040000 1.887237770000 -3.813481870000
H 0.071565860000 1.993368890000 -4.531043970000
H 1.115974040000 3.146060220000 -3.341761280000
Pt6+ GM structure A
Pt 8.188275000000 9.188508000000 8.039051000000
Pt 8.162366000000 9.227809000000 5.634964000000
Pt 10.234219000000 10.533209000000 5.615701000000
Pt 6.088850000000 7.924995000000 5.617413000000
Pt 6.117995000000 7.884159000000 8.066091000000
Pt 10.253932000000 10.500210000000 8.064520000000
Graphene slab
C 0.000000000000 15.986831000000 0.000000000000
C 2.839999000000 15.986831000000 0.000000000000
C 4.259999000000 15.986831000000 0.000000000000
C 7.099998000000 15.986831000000 0.000000000000
C 8.519997000000 15.986831000000 0.000000000000
C 11.360001000000 15.986831000000 0.000000000000
C 12.780001000000 15.986831000000 0.000000000000
C 15.620000000000 15.986831000000 0.000000000000
C 0.709997000000 14.757071000000 0.000000000000
C 2.130002000000 14.757071000000 0.000000000000
C 4.970001000000 14.757071000000 0.000000000000
C 6.390000000000 14.757071000000 0.000000000000
C 9.230000000000 14.757071000000 0.000000000000
C 10.649999000000 14.757071000000 0.000000000000
C 13.489998000000 14.757071000000 0.000000000000
C 14.909998000000 14.757071000000 0.000000000000
C 0.000000000000 13.527316000000 0.000000000000
C 2.839999000000 13.527316000000 0.000000000000
C 4.259999000000 13.527316000000 0.000000000000
C 7.099998000000 13.527316000000 0.000000000000
C 8.519997000000 13.527316000000 0.000000000000
C 11.360001000000 13.527316000000 0.000000000000
C 12.780001000000 13.527316000000 0.000000000000

```

C 15.620000000000 13.527316000000 0.000000000000  
C 0.709997000000 12.297561000000 0.000000000000  
C 2.130002000000 12.297561000000 0.000000000000  
C 4.970001000000 12.297561000000 0.000000000000  
C 6.390000000000 12.297561000000 0.000000000000  
C 9.230000000000 12.297561000000 0.000000000000  
C 10.649999000000 12.297561000000 0.000000000000  
C 13.489998000000 12.297561000000 0.000000000000  
C 14.909998000000 12.297561000000 0.000000000000  
C 0.000000000000 11.067806000000 0.000000000000  
C 2.839999000000 11.067806000000 0.000000000000  
C 4.259999000000 11.067806000000 0.000000000000  
C 7.099998000000 11.067806000000 0.000000000000  
C 8.519997000000 11.067806000000 0.000000000000  
C 11.360001000000 11.067806000000 0.000000000000  
C 12.780001000000 11.067806000000 0.000000000000  
C 15.620000000000 11.067806000000 0.000000000000  
C 0.709997000000 9.838051000000 0.000000000000  
C 2.130002000000 9.838051000000 0.000000000000  
C 4.970001000000 9.838051000000 0.000000000000  
C 6.390000000000 9.838051000000 0.000000000000  
C 9.230000000000 9.838051000000 0.000000000000  
C 10.649999000000 9.838051000000 0.000000000000  
C 13.489998000000 9.838051000000 0.000000000000  
C 14.909998000000 9.838051000000 0.000000000000  
C 0.000000000000 8.608290000000 0.000000000000  
C 2.839999000000 8.608290000000 0.000000000000  
C 4.259999000000 8.608290000000 0.000000000000  
C 7.099998000000 8.608290000000 0.000000000000  
C 8.519997000000 8.608290000000 0.000000000000  
C 11.360001000000 8.608290000000 0.000000000000  
C 12.780001000000 8.608290000000 0.000000000000  
C 15.620000000000 8.608290000000 0.000000000000  
C 0.709997000000 7.378535000000 0.000000000000  
C 2.130002000000 7.378535000000 0.000000000000  
C 4.970001000000 7.378535000000 0.000000000000  
C 6.390000000000 7.378535000000 0.000000000000  
C 9.230000000000 7.378535000000 0.000000000000  
C 10.649999000000 7.378535000000 0.000000000000  
C 13.489998000000 7.378535000000 0.000000000000  
C 14.909998000000 7.378535000000 0.000000000000  
C 0.000000000000 6.148780000000 0.000000000000  
C 2.839999000000 6.148780000000 0.000000000000  
C 4.259999000000 6.148780000000 0.000000000000  
C 7.099998000000 6.148780000000 0.000000000000  
C 8.519997000000 6.148780000000 0.000000000000  
C 11.360001000000 6.148780000000 0.000000000000  
C 12.780001000000 6.148780000000 0.000000000000  
C 15.620000000000 6.148780000000 0.000000000000  
C 0.709997000000 4.919025000000 0.000000000000  
C 2.130002000000 4.919025000000 0.000000000000  
C 4.970001000000 4.919025000000 0.000000000000  
C 6.390000000000 4.919025000000 0.000000000000  
C 9.230000000000 4.919025000000 0.000000000000  
C 10.649999000000 4.919025000000 0.000000000000  
C 13.489998000000 4.919025000000 0.000000000000  
C 14.909998000000 4.919025000000 0.000000000000  
C 0.000000000000 3.689270000000 0.000000000000  
C 2.839999000000 3.689270000000 0.000000000000  
C 4.259999000000 3.689270000000 0.000000000000  
C 7.099998000000 3.689270000000 0.000000000000  
C 8.519997000000 3.689270000000 0.000000000000  
C 11.360001000000 3.689270000000 0.000000000000  
C 12.780001000000 3.689270000000 0.000000000000  
C 15.620000000000 3.689270000000 0.000000000000  
C 0.709997000000 2.459510000000 0.000000000000  
C 2.130002000000 2.459510000000 0.000000000000  
C 4.970001000000 2.459510000000 0.000000000000  
C 6.390000000000 2.459510000000 0.000000000000  
C 9.230000000000 2.459510000000 0.000000000000  
C 10.649999000000 2.459510000000 0.000000000000  
C 13.489998000000 2.459510000000 0.000000000000  
C 14.909998000000 2.459510000000 0.000000000000  
C 0.000000000000 1.229755000000 0.000000000000  
C 2.839999000000 1.229755000000 0.000000000000  
C 4.259999000000 1.229755000000 0.000000000000  
C 7.099998000000 1.229755000000 0.000000000000  
C 8.519997000000 1.229755000000 0.000000000000  
C 11.360001000000 1.229755000000 0.000000000000  
C 12.780001000000 1.229755000000 0.000000000000  
C 15.620000000000 1.229755000000 0.000000000000  
C 0.709997000000 0.000000000000 0.000000000000  
C 2.130002000000 0.000000000000 0.000000000000  
C 4.970001000000 0.000000000000 0.000000000000  
C 6.390000000000 0.000000000000 0.000000000000  
C 9.230000000000 0.000000000000 0.000000000000  
C 10.649999000000 0.000000000000 0.000000000000  
C 13.489998000000 0.000000000000 0.000000000000  
C 14.909998000000 0.000000000000 0.000000000000  
C 1.420000000000 15.986831000000 3.349999000000  
C 4.259999000000 15.986831000000 3.349999000000  
C 5.679998000000 15.986831000000 3.349999000000  
C 8.519997000000 15.986831000000 3.349999000000  
C 9.940002000000 15.986831000000 3.349999000000  
C 12.780001000000 15.986831000000 3.349999000000  
C 14.200001000000 15.986831000000 3.349999000000  
C 17.040000000000 15.986831000000 3.349999000000  
C 2.130002000000 14.757071000000 3.349999000000  
C 3.550001000000 14.757071000000 3.349999000000  
C 6.390000000000 14.757071000000 3.349999000000  
C 7.810000000000 14.757071000000 3.349999000000  
C 10.649999000000 14.757071000000 3.349999000000  
C 12.069999000000 14.757071000000 3.349999000000  
C 14.909998000000 14.757071000000 3.349999000000  
C 16.329997000000 14.757071000000 3.349999000000

[Pt<sub>6</sub>/graphene]<sup>+</sup> Structure B















C 11.360001000000 13.527316000000 0.000000000000  
C 12.780001000000 13.527316000000 0.000000000000  
C 15.620000000000 13.527316000000 0.000000000000  
C 0.709997000000 12.297561000000 0.000000000000  
C 2.130002000000 12.297561000000 0.000000000000  
C 4.970001000000 12.297561000000 0.000000000000  
C 6.390000000000 12.297561000000 0.000000000000  
C 9.230000000000 12.297561000000 0.000000000000  
C 10.649999000000 12.297561000000 0.000000000000  
C 13.489998000000 12.297561000000 0.000000000000  
C 14.909998000000 12.297561000000 0.000000000000  
C 0.000000000000 11.067806000000 0.000000000000  
C 2.839999000000 11.067806000000 0.000000000000  
C 4.259999000000 11.067806000000 0.000000000000  
C 7.099998000000 11.067806000000 0.000000000000  
C 8.519997000000 11.067806000000 0.000000000000  
C 11.360001000000 11.067806000000 0.000000000000  
C 12.780001000000 11.067806000000 0.000000000000  
C 15.620000000000 11.067806000000 0.000000000000  
C 0.709997000000 9.838051000000 0.000000000000  
C 2.130002000000 9.838051000000 0.000000000000  
C 4.970001000000 9.838051000000 0.000000000000  
C 6.390000000000 9.838051000000 0.000000000000  
C 9.230000000000 9.838051000000 0.000000000000  
C 10.649999000000 9.838051000000 0.000000000000  
C 13.489998000000 9.838051000000 0.000000000000  
C 14.909998000000 9.838051000000 0.000000000000  
C 0.000000000000 8.608290000000 0.000000000000  
C 2.839999000000 8.608290000000 0.000000000000  
C 4.259999000000 8.608290000000 0.000000000000  
C 7.099998000000 8.608290000000 0.000000000000  
C 8.519997000000 8.608290000000 0.000000000000  
C 11.360001000000 8.608290000000 0.000000000000  
C 12.780001000000 8.608290000000 0.000000000000  
C 15.620000000000 8.608290000000 0.000000000000  
C 0.709997000000 7.378535000000 0.000000000000  
C 2.130002000000 7.378535000000 0.000000000000  
C 4.970001000000 7.378535000000 0.000000000000  
C 6.390000000000 7.378535000000 0.000000000000  
C 9.230000000000 7.378535000000 0.000000000000  
C 10.649999000000 7.378535000000 0.000000000000  
C 13.489998000000 7.378535000000 0.000000000000  
C 14.909998000000 7.378535000000 0.000000000000  
C 0.000000000000 6.148780000000 0.000000000000  
C 2.839999000000 6.148780000000 0.000000000000  
C 4.259999000000 6.148780000000 0.000000000000  
C 7.099998000000 6.148780000000 0.000000000000  
C 8.519997000000 6.148780000000 0.000000000000  
C 11.360001000000 6.148780000000 0.000000000000  
C 12.780001000000 6.148780000000 0.000000000000  
C 15.620000000000 6.148780000000 0.000000000000  
C 0.709997000000 4.919025000000 0.000000000000  
C 2.130002000000 4.919025000000 0.000000000000  
C 4.970001000000 4.919025000000 0.000000000000  
C 6.390000000000 4.919025000000 0.000000000000  
C 9.230000000000 4.919025000000 0.000000000000  
C 10.649999000000 4.919025000000 0.000000000000  
C 13.489998000000 4.919025000000 0.000000000000  
C 14.909998000000 4.919025000000 0.000000000000  
C 0.000000000000 3.689270000000 0.000000000000  
C 2.839999000000 3.689270000000 0.000000000000  
C 4.259999000000 3.689270000000 0.000000000000  
C 7.099998000000 3.689270000000 0.000000000000  
C 8.519997000000 3.689270000000 0.000000000000  
C 11.360001000000 3.689270000000 0.000000000000  
C 12.780001000000 3.689270000000 0.000000000000  
C 15.620000000000 3.689270000000 0.000000000000  
C 0.709997000000 2.459510000000 0.000000000000  
C 2.130002000000 2.459510000000 0.000000000000  
C 4.970001000000 2.459510000000 0.000000000000  
C 6.390000000000 2.459510000000 0.000000000000  
C 9.230000000000 2.459510000000 0.000000000000  
C 10.649999000000 2.459510000000 0.000000000000  
C 13.489998000000 2.459510000000 0.000000000000  
C 14.909998000000 2.459510000000 0.000000000000  
C 0.000000000000 1.229755000000 0.000000000000  
C 2.839999000000 1.229755000000 0.000000000000  
C 4.259999000000 1.229755000000 0.000000000000  
C 7.099998000000 1.229755000000 0.000000000000  
C 8.519997000000 1.229755000000 0.000000000000  
C 11.360001000000 1.229755000000 0.000000000000  
C 12.780001000000 1.229755000000 0.000000000000  
C 15.620000000000 1.229755000000 0.000000000000  
C 0.709997000000 0.000000000000 0.000000000000  
C 2.130002000000 0.000000000000 0.000000000000  
C 4.970001000000 0.000000000000 0.000000000000  
C 6.390000000000 0.000000000000 0.000000000000  
C 9.230000000000 0.000000000000 0.000000000000  
C 10.649999000000 0.000000000000 0.000000000000  
C 13.489998000000 0.000000000000 0.000000000000  
C 14.909998000000 0.000000000000 0.000000000000  
C 0.000000000000 15.986831000000 3.349999000000  
C 2.839999000000 15.986831000000 3.349999000000  
C 4.259999000000 15.986831000000 3.349999000000  
C 5.679998000000 15.986831000000 3.349999000000  
C 8.519997000000 15.986831000000 3.349999000000  
C 9.940002000000 15.986831000000 3.349999000000  
C 12.780001000000 15.986831000000 3.349999000000  
C 14.200001000000 15.986831000000 3.349999000000  
C 17.040000000000 15.986831000000 3.349999000000  
C 2.130002000000 14.757071000000 3.349999000000  
C 3.550001000000 14.757071000000 3.349999000000

C 16.329997000000 0.000000000000 3.349999000000  
Pt<sub>4</sub>V<sub>2</sub> Iso-I PBE0/def-tzvp  
Pt -1.123813050000 -1.412168260000 0.332821980000  
Pt -1.702593610000 0.301296860000 -1.515390590000  
Pt 1.655406860000 1.591566650000 0.146800560000  
V -0.766059920000 1.151908070000 0.663024920000  
Pt 1.188657950000 -0.722921060000 1.201431920000  
V 0.745865630000 -0.239317370000 -1.325253980000  
Pt<sub>4</sub>V<sub>2</sub> Iso-II PBE/def2-tzvp  
V 0.045252010000 -0.505039540000 -0.114465430000  
V -0.179472250000 1.995046520000 0.471624620000  
Pt 0.235324720000 -2.579506640000 -0.537180110000  
Pt -0.221914170000 1.148348290000 -1.758726890000  
Pt 1.758677150000 0.682006340000 0.971508240000  
Pt -1.734949350000 0.318514760000 1.180411790000
